# 1 Distinct co-modulation rules of synaptic and voltage-gated currents 2 coordinates interactions of multiple neuromodulators

3 Xinping Li, Dirk Bucher and Farzan Nadim

4 *Federated Department of Biological Sciences, New Jersey Institute of Technology and Rutgers*  
5 *University-Newark, 323 Martin Luther King Blvd, Newark, NJ 07102*

6 **Acknowledgements:** This work was supported by NIH Grants MH060605 and NS083319.

7 **Competing Interests:** The authors declare no competing interests.

8 Figures: 8

9 Figure Supplements: 3

## 10 Abstract

11 Different neuromodulators usually activate distinct receptors but can have overlapping  
12 targets. Consequently, circuit output depends on neuromodulator interactions at shared  
13 targets, a poorly understood process. We explored quantitative rules of co-modulation of two  
14 principal targets: voltage-gated and synaptic ionic currents. In the stomatogastric ganglion of  
15 the crab *Cancer borealis*, the neuropeptides proctolin and CCAP modulate synapses of the  
16 pyloric circuit, and activate a voltage-gated current ( $I_{MI}$ ) in multiple neurons. We examined the  
17 validity of a simple dose-dependent quantitative rule that co-modulation by proctolin and CCAP  
18 is predicted by the linear sum of the individual effects of each modulator, up to saturation. We  
19 found that this rule is valid for co-modulation of synapses, but not for the activation of  $I_{MI}$ ,  
20 where co-modulation was sublinear. Given the evolutionary conservation of neuromodulator  
21 receptors and signaling pathways, such distinct rules for co-modulation of different targets are  
22 likely to be common across neuronal circuits.

## 23 Introduction

24 All nervous systems adapt to changes in the environment and the internal state of the  
25 animal. In different contexts, awake or asleep, fed or hungry, light or dark, neuronal circuits  
26 produce different output (Xia and Mills, 2004; Inagaki et al., 2014; Wester and McBain, 2014;  
27 Burke et al., 2015; Filosa et al., 2016). This context-dependent output is actively shaped by  
28 various neuromodulators through changes in neuronal and synaptic properties (reviewed in  
29 Brezina, 2010; Bargmann, 2012; Marder, 2012; Nadim and Bucher, 2014). The large number of

30 neuromodulators identified within species clearly indicates that, at any time, every neuronal  
31 circuit is co-modulated by a number of these substances (Marder and Bucher, 2007; Taghert  
32 and Nitabach, 2012; van den Pol, 2012; Richter et al., 2014; Su et al., 2014). The combination  
33 and distribution of neuromodulators present depends on context, and often is the means to  
34 convey it (Cohn et al., 2015 ; Lovett-Barron et al., 2017; White et al., 2017). Consequently,  
35 essential behaviors such as breathing, sleeping, learning, and mating, as well as cognitive tasks,  
36 rely on combined actions of multiple neuromodulators (Doi and Ramirez, 2008; Woods et al.,  
37 2014; He et al., 2015; Yamazoe-Umemoto et al., 2015; Mena et al., 2016; Asahina, 2017; Donlea  
38 et al., 2017). Thus, proper neuronal circuit function depends on specific combinations of  
39 neuromodulators, and how they act in concert.

40 While much is known about the actions of single neuromodulators, few studies have  
41 explored how multiple neuromodulators interact. Most of these studies have provided  
42 qualitative descriptions of altered output at the systems level (Brezina et al., 1996; Dickinson et  
43 al., 1997; Mesce et al., 2001; Thirumalai and Marder, 2002; Beliez et al., 2014). Only a handful  
44 of studies have explored the combined actions of neuromodulators on their direct targets, also  
45 mostly qualitatively (McCormick and Pape, 1990; Parker, 2000; Djokaj et al., 2001; Svensson et  
46 al., 2001; Park and Spruston, 2012; Garcia et al., 2015).

47 Neuromodulator targets fall into two categories: ionic currents that shape neuronal  
48 excitability, and synapses, which determine circuit organization. In a single neuron, a single  
49 neuromodulator can have multiple subcellular targets (divergence) and multiple  
50 neuromodulators can have overlapping targets (convergence) (reviewed in Nadim and Bucher,  
51 2014). Such patterns of divergence and convergence can result in complex co-modulatory  
52 effects on neuron and synapse function, and consequently circuit output.

53 To understand how co-modulation shapes circuit output, it is important to characterize  
54 how co-modulation occurs at shared targets. Here we focus on convergent co-modulation of  
55 synapses and voltage-gated currents by exploring 1) if the combined actions of  
56 neuromodulators on a shared target can be predicted quantitatively from their individual  
57 actions, and 2) if co-modulation of synaptic and voltage-gated ionic currents in a neuron follows  
58 the same rule. For neuromodulators with converging signaling pathways, the most  
59 parsimonious prediction would be that their effects at a shared target simply add up linearly to  
60 produce a combined effect, up to the saturation level. It should be noted, however, that such  
61 linear addition does not exclude the possibility that each separate modulator effect might have  
62 a distinct dose-dependence that is inherently nonlinear. In addition, the dynamics and  
63 physiological effects of modulating a target can be complex and nonlinear.

64 In this study, we used the pyloric circuit of the crab stomatogastric ganglion (STG) to  
65 examine whether the dose-dependent actions of two peptide neuromodulators on their targets

66 can be predicted by the linear summation of their individual actions, up to saturation. Several  
67 peptides activate  $I_{MI}$ , a voltage-gated ionic current (Golowasch and Marder, 1992; Swensen and  
68 Marder, 2000) in STG neurons, likely through converging signaling pathways from different  
69 receptors (Garcia et al., 2015; Gray et al., 2017). Some also modulate pyloric synapses  
70 (Thirumalai et al., 2006; Zhao et al., 2011; Garcia et al., 2015). We measured the influence of  
71 two peptide neuromodulators on synaptic currents and on  $I_{MI}$ . Because the influence of the  
72 peptides on these components can be assayed simultaneously, they provide a good test for  
73 understanding the rules of co-modulation of different aspects of neuronal processing. We  
74 found that co-modulation of synaptic transmission and the voltage-gated current follows  
75 distinct rules—a mechanism likely to be generalizable. The machinery underlying  
76 neuromodulation is evolutionarily well conserved and most receptors have homologs across  
77 invertebrate and vertebrate systems (Mirabeau and Joly, 2013; Lovett-Barron et al., 2017), and  
78 many neuromodulators share G-protein mediated signaling pathways (Doi and Ramirez, 2008).  
79 Thus, such distinct rules for co-modulation of different components are likely to be used in  
80 other neuronal circuits and by other neuromodulators.

## 81 Results

82 We explored the modulatory effects of the two neuropeptides CCAP and Proc on  $I_{MI}$  in  
83 the lateral pyloric (LP), and on the reciprocal synapses between LP and the pyloric dilator (PD)  
84 and neurons. The influence of these peptides on pyloric neurons and synapses can be assayed  
85 simultaneously, while all other neuromodulatory inputs are removed.

86 We began by quantifying the individual modulatory effects of CCAP and Proc on both  
87 synapses and  $I_{MI}$  in the LP neuron across a range of concentrations, ranging from subthreshold  
88 to saturation. These dose-dependent quantifications allowed us to build predictors of the  
89 modulatory effect of each individual modulator at any concentration.

90 We then characterized the effect of co-application of both peptides in two stages. First,  
91 we examined if co-modulation is history dependent by co-applying the peptides following  
92 exposure to either Proc or CCAP, as interactions between neuromodulators can depend the  
93 order of application and produce priming or gating (Dickinson et al., 1997; Svensson et al.,  
94 2001). Then, in separate experiments, we tested the effect of various combinations of the two  
95 peptides, applied at different concentrations, and compared the results with the predictions of  
96 the linear summation rule.

### 97 Dose-dependent effect of individual peptides on the synapses

98 We quantified the individual modulatory effects of CCAP and Proc in separate sets of  
99 experiments. In each experiment, we measured the effect of the peptide on both the LP to PD

100 and the PD to LP synapses. Hence, we will discuss four different synapse-peptide cases: LP to  
101 PD-CCAP, LP to PD-Proc, PD to LP-CCAP and PD to LP-Proc.

102 In each synapse-peptide case, we measured the postsynaptic current in control and in  
103 increasing concentrations of the peptide with simultaneous two-electrode voltage clamp  
104 recordings of both neurons (Figure 1A). In the STG, two identical PD neurons and the anterior  
105 burster (AB) neuron are strongly electrically coupled and form the pacemaker group. Unless  
106 specified otherwise, the PD to LP synapse in this study refers to the combined synaptic current  
107 from the pacemaker group to the LP neuron. As expected for a graded synapse, the amplitude  
108 of postsynaptic current increased as the presynaptic step voltage increased (Figure 1B and C).  
109 The current-voltage relationship of each synapse was fit with the sigmoidal curve given by  
110 equation (1), which is described by three parameters:  $I_{max}$  (synaptic amplitude),  $V_{mid}$  (half-  
111 activation voltage) and  $V_c$  (slope factor at  $V_{mid}$ ). A more positive  $V_{mid}$  indicates a higher  
112 threshold for activation and larger  $V_c$  means a shallower activation curve (Figure 1D). For each  
113 synapse-peptide pair, we examined how  $I_{max}$ ,  $V_{mid}$  and  $V_c$  were changed by the peptides (Figure  
114 2).

115 For the LP to PD synapse, both CCAP and Proc significantly increased  $I_{max}$ , shifted  $V_{mid}$  to  
116 more negative potentials, and reduced  $V_c$  across concentrations (Figure 2A). In contrast, for the  
117 PD to LP synapse, CCAP only increased  $I_{max}$ , but did not affect  $V_{mid}$  or  $V_c$ , while Proc only  
118 decreased  $V_c$ , but did not affect  $I_{max}$  or  $V_{mid}$  (Figure 2A).

119 Notably, the same peptide differentially modulated different synapses. For example,  
120 CCAP changed  $I_{max}$ ,  $V_{mid}$ , and  $V_c$  at the LP to PD synapse, but only  $I_{max}$  at the PD to LP synapse. In  
121 addition, different peptides had different effects on the same synapse. For example, CCAP  
122 changed only  $I_{max}$  at the PD to LP synapse, while Proc changed  $V_c$ . Overall, both CCAP and Proc  
123 strengthened both synapses, although the manner of modulation depended on the synapse  
124 and the modulator.

125 We used the data shown in Figure 2 to build predictors for each synapse-peptide pair.  
126 The predictor is a surface fit to all synaptic current amplitudes, measured at different  
127 presynaptic voltage steps and modulation concentrations (Figure 3), which has a sigmoidal  
128 relationship with both the presynaptic voltage and the log of the modulator concentration (fit  
129 given by equation (3)). These predictors allow us to estimate the synaptic current at any voltage  
130 and modulator concentration by interpolation. The surface fits also allow us to visualize and  
131 measure the distinct modulation effects of the two peptides on each synapse and of each  
132 peptide on the two synapses.

## 133 The saturation level of the co-modulatory effect on the synapses is not history 134 dependent

135 Our main hypothesis assumes that the saturation of synaptic co-modulation is not  
136 affected by the order of application; that is, one modulator does not gate or prime the effect of  
137 the other modulator. Prior to testing our hypothesis, it was therefore important to verify this  
138 assumption. To test if the co-modulatory saturation level depended on the prior application of  
139 either modulator, we did two separate sets of experiments for each synapse. In each  
140 experiment, we saturated the synapse with either Proc or CCAP first, and then with both  
141 peptides co-applied.

142 Saturation of neuromodulatory effects can occur when the receptors, the signaling  
143 pathways, or the targets themselves reach maximum capacity. Co-modulatory effects at high  
144 concentrations depend on the degree to which the different neuromodulators occlude each  
145 other's effects. If the separate effects of two neuromodulators saturate because the common  
146 target is maximally modulated, the effect of each modulator occludes the effect of the other. If  
147 the separate effects of two neuromodulators saturate because their respective receptors are  
148 saturated, neither modulator's effect should completely occlude the other's. If the signaling  
149 pathways saturate, occlusion depends on pathway interactions.

150 We first examined if co-modulation produced an additional effect above that of the  
151 single neuromodulator at 1  $\mu$ M, the presumed saturation concentration of peptide effects in  
152 the STG (Zhao et al., 2011). In only one of the four cases, co-modulation increased the effect.  
153 For the PD to LP synapse, Proc did not completely occlude the effect of adding CCAP, probably  
154 because saturating Proc receptors alone does not fully activate the target. In the other three  
155 cases, co-application did not produce an additional effect (Figure 4). The fact that complete  
156 occlusion was achieved in both synapses by at least one peptide confirms that synapse  
157 modulation was maximal when both peptides were applied at 1  $\mu$ M.

158 Notably, at both synapses, co-modulatory effects were not dependent on the order of  
159 application. Synaptic activation curves were not statistically different between experiments in  
160 which either CCAP or Proc were applied first (Figure 4). We also verified that the control  
161 measurements were not different for each synapse. Therefore, although co-modulation may  
162 have additional effects depending on the neuromodulator and the synapse, the saturation level  
163 of synaptic co-modulation was not history dependent.

## 164 Neither CCAP nor Proc modulates short-term synaptic plasticity

165 The pyloric circuit is rhythmically active with a frequency between  $\sim$ 0.5 and 2 Hz  
166 (Goaillard et al., 2009). Like many synapses in the STG, the LP to PD and PD to LP synapses  
167 exhibit short-term synaptic depression (Tseng and Nadim, 2010; Zhao et al., 2011). In

168 rhythmically active circuits, short-term synaptic plasticity means that the strength of the  
169 synapse depends on the period of the rhythm (Manor and Nadim, 2001). This means that  
170 depressing synapses are the stronger the faster the rhythm is, whereas the opposite is true for  
171 facilitating synapses. Hence, neuromodulation of short-term synaptic plasticity can play an  
172 important role in shaping circuit output and dynamics.

173 At both synapses, we found that neither CCAP, nor Proc, nor co-application of both,  
174 significantly changed the level of short-term synaptic depression with a presynaptic voltage  
175 step of 40 mV amplitude (Figure 5). This is consistent with a prior study of the effects of Proc on  
176 the PD voltage responses to large LP depolarizations (Zhao et al., 2011). In the same study, Zhao  
177 et al. (2011) described a significant effect on short-term synaptic dynamics when smaller  
178 presynaptic voltage-steps were used. However, a detailed analysis of the voltage-dependence  
179 of modulatory effects on synaptic plasticity exceeded the scope of our study.

### 180 Co-modulatory effects on synapses are linearly additive up to saturation

181 After establishing that the saturation level of co-modulation is not history dependent,  
182 we used equation (6) to calculate the co-modulation predictions for the synapses. Recall that  
183 the individual effects of the two peptides were modeled by the predictors for their dose-  
184 dependent effects (equation (3) and Figure 3). The linear summation rule predicts that the co-  
185 modulatory effect is the sum of the individual modulatory enhancements due to Proc and CCAP  
186 at their respective concentrations (equation (4)), up to saturation. We tested this prediction on  
187 both synapses with 18 different modulator combinations (see Methods).

188 We compared our predictions with the experimental results by computing the  
189 coefficient of determination ( $R^2$ , evaluating the trend of the data) and normalized root mean  
190 squared error (NRMSE, evaluating the deviation of the data from the prediction; see Methods).  
191 We report these statistics for each combination individually, and also report the overall  $R^2$  and  
192 NRMSE for all combinations.

193 For the LP to PD synapse, our prediction matched the experimental results exceedingly  
194 well (examples shown in Figure 6A, [all data provided in Figure 6-source data](#)). The comparison  
195 between predicted and measured values showed high prediction accuracy (Figure 6B, the line  $y = x$   
196 indicates a perfect match). For all combinations, we obtained high  $R^2$  and low NRMSE  
197 values, indicating that our predictions both captured the trend of the data well and had  
198 negligible deviation from the data (Figure 6C; see Figure 6-figure supplement for exact values).  
199 The overall values were  $R^2 = 0.90$  and NRMSE = 0.31 for this synapse. We therefore concluded  
200 that co-modulation of LP to PD synapse can be predicted from effects of individual peptides  
201 using the linear summation rule.

202 We observed similar accuracy of the linear prediction for the PD to LP synapse  
203 (examples shown in Figure 7A, [all data provided in Figure 7-source data](#)). The predictions for  
204 the PD to LP synapse also had high  $R^2$  and low NRMSE, with an overall  $R^2 = 0.73$  and NRMSE =  
205 0.52 (Figure 7B and C; see Figure 7-figure supplement for exact values). These values indicate  
206 that co-modulation of the PD to LP synapse was predicted well by the linear summation rule, if  
207 not quite as accurately as at the LP to PD synapse.

## 208 [Co-modulatory effects on \$I\_{MI}\$ are not linearly additive](#)

209 Our data indicate that the co-modulatory effects of Proc and CCAP on the synapses  
210 were linearly additive, up to saturation. This suggests that the intracellular pathways underlying  
211 the Proc and CCAP effects converge in the LP and PD neurons, without additional interactions. If  
212 so, it is reasonable to assume that the activation of  $I_{MI}$  by Proc and CCAP would also follow the  
213 same rule.

214 The protocols that we used to measure the synaptic current from LP to PD also allowed  
215 us to estimate the level of  $I_{MI}$  in the LP neuron (see Methods and Figure 8A). We therefore  
216 quantified the dose-dependent activation of  $I_{MI}$  in the presence of either Proc or CCAP. Both  
217 peptides activated  $I_{MI}$  starting at nanomolar concentrations and consistently produced larger  
218 currents as the concentration increased (Figure 8B and C).

219 In each experiment, either Proc or CCAP was applied at increasing concentrations up to  
220  $1\mu\text{M}$ , and then both peptides were co-applied at  $1\mu\text{M}$  each. Co-application revealed complete  
221 occlusion in both directions and did not show history dependence (Figure 8C): The addition of  
222 the second peptide did not significantly increase the  $I_{MI}$  response, and  $I_{MI}$  values were not  
223 significantly different between the different orders of application.

224 The dose-dependent curves for the two peptides were used to construct the predictors  
225 of the co-modulation effect (equation (5)). From these individual predictors, we calculated the  
226  $I_{MI}$  levels expected to be activated by each peptide at any concentration, using linear  
227 summation to saturation (equation (7)). As with the synapses, we compared the predicted  $I_{MI}$   
228 levels to the actual measurements in 18 different co-modulation combinations. We then  
229 calculated the  $R^2$  and NRMSE values for each individual combination and for all combinations  
230 together. For these comparisons,  $I_{MI}$  was measured at  $-15\text{ mV}$ . Calculations of the  $R^2$  and  
231 NRMSE values with the peak  $I_{MI}$  level, derived from the fitted IV curves (equation (2)), produced  
232 similar results ([Figure 8-source data](#)).

233 Surprisingly, and in stark contrast to the synapses, our predictions were far from the  
234 measured values of the co-modulated  $I_{MI}$  in the LP neuron (Figure 8E top). The comparison  
235 between predicted and measured  $I_{MI}$  value shows over-estimation in most of the data points  
236 (Figure 8D). For half of the combinations,  $R^2$  values were below 0 and NRMSE values were

237 above 1 (Figure 8E middle; see Figure 8-figure supplement for exact values). The low overall  $R^2$   
238 value of 0.08 and high overall NRMSE value of 0.96 indicate that our linear summation model  
239 was a very poor predictor for the co-modulation of  $I_{MI}$  and in fact no better than using the mean  
240 of the data as a predictor.

241 Interestingly, also in contrast to the fairly consistent  $R^2$  and NRMSE values across  
242 different co-modulation combinations for the synapses, these values varied drastically across  
243 different combinations for  $I_{MI}$  (Figure 8E middle). The predictor did very poorly (NRMSE>1)  
244 when at least one of the peptide was at a low concentration, but somewhat better (NRMSE  
245 closer to 0) when the combined concentrations were high, mostly because the predictor  
246 estimated the co-modulation to be at saturation (Figure 8E).

247 Despite the poor prediction, our linear model provided some useful information about  
248 the dynamics of  $I_{MI}$  co-modulation. The measured  $I_{MI}$  level was always lower than the  
249 prediction, indicating that the co-modulatory effect was sublinear.

## 250 Discussion

### 251 Distinct rules for co-modulation of different subcellular targets

252 It is common for multiple neuromodulators to target the same ion channel or synapse,  
253 or have distinct targets within the same neuron (McCormick and Williamson, 1989; Harris-  
254 Warrick, 2011; Marder, 2012). As such, circuit output depends on how signaling pathways  
255 mediated by distinct neuromodulator receptors converge and interact. The actions of  
256 converging neuromodulators may have the same or opposing signs (Nadim and Bucher, 2014).  
257 Regardless of the signs of the action, converging neuromodulators could have additive,  
258 synergistic, antagonistic, or other nonlinear co-modulatory effects. For a given target, it is  
259 important to know if convergent neuromodulators act in a simple additive manner or have  
260 more complex, nonlinear interactions. An additional open question is whether the interactions  
261 of neuromodulators that converge onto multiple subcellular targets follow the same rule at all  
262 shared targets.

263 Despite recent advances in genetic and imaging tools (Arrigoni and Saper, 2014; Cohn et  
264 al., 2015; Shahidi et al., 2015), many systems still lack experimental accessibility or the basic  
265 understanding of neuromodulator actions on their cellular and subcellular targets to explore  
266 this topic. Peptide neuromodulation of the pyloric circuit of the STG provides a special  
267 opportunity to explore the rules of co-modulation of synaptic and intrinsic ionic currents, and  
268 to understand their consequences at the circuit level (Daur et al., 2016). We observed linearly  
269 additive co-modulation of synapses, but sub-linearly additive co-modulation of a voltage-gated  
270 ionic current in the same neurons. These specific results may be idiosyncratic for the neurons  
271 and synapses we studied, as co-modulation of synapses can be nonlinear (Parker, 2000), and



272 co-modulation of voltage-gated ionic currents could be linearly additive. However, the  
273 important lesson from our findings is that converging co-modulation of synapses and ionic  
274 currents by the same neuromodulators, or different subcellular targets in general, can follow  
275 distinct rules. Given the complex patterns of divergence and convergence of neuromodulators  
276 in many systems, this finding likely has broad functional implications.

### 277 [Linearly additive co-modulation of pyloric synapses](#)

278 Modulation of synaptic currents may involve both presynaptic changes in transmitter  
279 release and postsynaptic changes in ionotropic receptor properties. Therefore, the total effect  
280 can result from modulation of molecular components in two different neurons, involving  
281 potentially distinct signaling pathways and concentration dependence. At synapses in the STG,  
282 a single neuromodulator can exert functionally opposing effects on the pre- and postsynaptic  
283 sides, for example enhancing transmitter release but reducing postsynaptic responsiveness  
284 (Harris-Warrick and Johnson, 2010; Garcia et al., 2015). We therefore did not necessarily expect  
285 co-modulation of synapses to be simply linearly additive. Surprisingly, we observed such  
286 linearly additive co-modulation at both synapses. For the LP to PD synapse, CCAP modulation  
287 must be presynaptic, as PD neurons do not express CCAP receptors (Garcia et al., 2015).  
288 However, Proc modulation could have both pre- and postsynaptic components. Although Proc  
289 receptor expression in these neurons has not been tested because their molecular identity has  
290 not been determined in the STG, both neurons show  $I_{MI}$  activation in response to Proc  
291 application (Swensen and Marder, 2000). For the PD to LP synapse, both modulators could have  
292 pre- and postsynaptic effects. The synaptic input to the LP neuron from the pacemaker (which  
293 we measured as the PD to LP synapse) is from both AB and PD neurons. AB expresses CCAP  
294 receptors (Garcia et al., 2015) and isolated AB neurons respond to both CCAP and Proc  
295 (Swensen and Marder, 2001). The fact that we measured the synaptic responses of LP while  
296 voltage clamping only one of the presynaptic neurons may explain why linear summation less  
297 accurately predicts co-modulation compared to the LP to PD synapse (Figures 6 and 7).

298 We did not investigate whether neuromodulatory effects occurred pre- or  
299 postsynaptically, or both. However, given that we observed linear summation and occlusion, it  
300 is likely that modulatory signaling on either side was purely converging, without any nonlinear  
301 interactions. Linear co-modulation could also occur through spatial segregation, for example,  
302 when one neuromodulator only acts presynaptically, and the other only postsynaptically. Even  
303 in a single neuron, modulatory micro-domains can provide non-overlapping, independent  
304 activation of identical targets using the same signaling pathways (Lur and Higley, 2015).  
305 However, in the case of spatial segregation, no occlusion should occur, and the saturation level  
306 of co-modulation should be the linear sum of the maximum effects achieved by each  
307 neuromodulator.

## 308 Sublinear co-modulation of $I_{MI}$

309 In contrast to the synapses, we observed nonlinear co-modulation of  $I_{MI}$ , which  
310 indicated that the signaling pathways targeting  $I_{MI}$  were distinct from the pathways targeting  
311 the synapses. It was previously suggested that peptides modulate synapses in the STG through  
312 their actions on the  $I_{MI}$  channel, which might be partially permeable to calcium (Zhao et al.,  
313 2011; Gray et al., 2017). However, our results indicate that this is unlikely, given that linear co-  
314 modulation of the synapses and nonlinear co-modulation of  $I_{MI}$  occurred in the same  
315 experiments. The nonlinearity of  $I_{MI}$  co-modulation may have two components: sublinear  
316 interactions when at least one modulator is at low concentration, and occlusion when both are  
317 at high concentrations (Figure 8E). The occlusion effect was also shown in our previous study  
318 (Garcia et al., 2015).

319 In *C. borealis*, the Proc receptor gene has not been identified, and there appears to be  
320 only one CCAP receptor gene (Garcia et al., 2015). In insects, Proc receptors come from a single  
321 gene (Caers et al., 2012). Different CCAP receptor genes have been found to produce receptors  
322 that differ more than 30-fold in their agonist affinities (Li et al., 2011), but the underlying gene  
323 duplication is thought to have occurred only in some insect lineages. However, this does not  
324 exclude the possibility of post-translational modifications that could result in receptors with  
325 different agonist affinities or differential activation of different signaling pathways (Leclerc et  
326 al., 2006; Daaka, 2012). This opens the possibility that in the STG, peptides activate  $I_{MI}$  through  
327 receptor subtypes with different affinities. If so, the low- and high-affinity pathways mediated  
328 by the same peptides should undergo simple convergence, because the dose-dependent  
329 activation of  $I_{MI}$  is sigmoidal (Figure 8C). Similarly, the low-affinity receptor mediated pathways  
330 should also converge without lateral interactions, resulting in occlusion at high concentrations.  
331 However, the high-affinity pathway mediated by one peptide might inhibit the low-affinity  
332 pathway mediated by the other, possibly by targeting the intracellular calcium concentration or  
333 calcium-binding proteins (Gray et al., 2017), thus reducing the  $I_{MI}$  level activated by the low-  
334 affinity pathway. Such an interaction may remain distinct from the linear additive rule of the LP  
335 to PD synapses, e.g., if the synaptic neuromodulation pathway is through distinct signaling  
336 molecules activated by these receptors.

337 Another possible mechanism is that the CCAP and Proc receptors can form a heteromer  
338 complex and display behaviors distinct from either receptor alone (reviewed in Smith and  
339 Milligan, 2010). Given the variety of possible mechanisms, a different set of experiments, as  
340 well as mathematical modeling, will be required to provide an accurate description of the co-  
341 modulation rule for  $I_{MI}$ .

## 342 Distinct co-modulation rules may increase flexibility and functionally uncouple the 343 modulation of different targets

344 When different neuromodulators converge onto multiple targets, their actions on the  
345 shared targets are inextricably linked. However, modulator effects on different targets can be  
346 uncoupled by different co-modulation rules. For example, in the results shown here, 1 nM CCAP  
347 and 100 nM Proc produced an additive effect in the LP to PD synapse, but activated much less  
348  $I_{MI}$  than 100 nM Proc alone (Figures 6A, 8C and 8E). In the pyloric circuit,  $I_{MI}$  enhances neuronal  
349 excitability of the pacemaker neurons and thereby regulates the pyloric frequency (Hooper and  
350 Marder, 1987). The synapses from the pacemaker neurons (AB and PD) to follower neurons like  
351 LP are important for the regulation of burst phasing across pyloric neurons (Eisen and Marder,  
352 1984; Rabbah and Nadim, 2005; Goillard et al., 2009). The feedback synapse from LP to PD has  
353 little effect on the mean rhythm frequency, but reduces its variability (Zhao et al., 2011).  
354 Distinct rules for co-modulation of neuronal excitability and synaptic interactions could  
355 functionally uncouple these effects and therefore allow burst phasing and rhythm frequency to  
356 be regulated differentially.

357 Furthermore, sub-linear co-modulation of  $I_{MI}$  may extend the dynamic range for the  
358 modulation of neural excitability by producing qualitatively different effects than each  
359 individual neuromodulator. Because STG neurons are modulated by many peptides, sublinear  
360 co-modulation would ensure that neuronal excitability is not saturated during baseline activity  
361 when many peptides may be present at low concentrations. Yet, when any specific peptide  
362 neuromodulator is released at a higher concentration, it can produce a distinct circuit output.

## 363 Co-modulation in light of animal-to-animal variability

364 Across individuals, pyloric neurons display substantial variability in the magnitude of  
365 synaptic and voltage-gated ionic currents, as well as in the expression levels of mRNAs that  
366 code for ion channels (Golowasch et al., 1999; Schulz et al., 2006; Schulz et al., 2007; Goillard  
367 et al., 2009). Despite this variability, which is several-fold in some cases, neuronal excitability  
368 and the patterning of circuit activity is well maintained (Bucher et al., 2005; Goillard et al.,  
369 2009; Marder et al., 2015). Substantial variability has also been described for neuromodulatory  
370 components. For example, CCAP receptor mRNA expression varies 3-fold in the LP neuron  
371 ( $n=22$  in Garcia et al., 2015), and CCAP-activated  $I_{MI}$  in the LP neuron varies more than 5-fold in  
372 amplitude ( $n=15$  in Goillard et al., 2009). There may also be long-term regulatory changes in  
373 neuromodulation, perhaps due to seasonal or molt cycle related hormonal changes, which are  
374 almost impossible to control for in wild caught animals. In contrast to the data presented here,  
375 in a previous study we found that, in LP, CCAP activated a larger  $I_{MI}$  than Proc did, and the Proc  
376 response was not saturating (Garcia et al., 2015). In this study, we only tested each co-  
377 modulation combination on a small number of animals ( $n=4-6$ ), but the total number of animals

378 we used in this study (n=33) matched the variability of  $I_{MI}$  levels seen in the previous studies.  
379 The fact that, despite this variability, the linear summation rule accurately predicted co-  
380 modulation of the synapses indicates that, co-modulation rules appear to be robust across  
381 individuals, despite component variability.

## 382 Bridging levels of co-modulation effects

383 Unraveling the consequences of co-modulation at the circuit level requires examining  
384 their interactions at multiple levels. In this study, we took a first step toward identifying the  
385 rules of co-modulation at the level of shared targets. However, our study leaves several  
386 questions unanswered.

387 First, the signaling pathways resulting in our observed data remain unknown. Second,  
388 we bath applied neuromodulators in our study, which was necessary to quantify precise dose-  
389 dependent effects, but as a number of studies in the STG have shown, fails to address the  
390 spatiotemporal dynamics of neuromodulation (Nusbaum et al., 2017). Neuromodulators can be  
391 released as hormones or as neurotransmitters. In the latter case, spatiotemporal properties of  
392 synaptic transmission can be critical in determining circuit output (reviewed in Nusbaum et al.,  
393 2017). The spatial interactions depend on the architecture of the local circuits, the spatial  
394 pattern of neuromodulator release and the peptidase activity. For neurotransmitter  
395 modulators, the temporal dynamics is, by necessity, determined by the patterns of activity of  
396 the modulatory neurons that release these transmitters. The activity patterns of the  
397 modulatory neurons, in turn, is subject to feedback from the activity of the target circuits,  
398 thereby producing another potential level of complexity. To probe the spatiotemporal dynamics  
399 of co-modulation, combining experimental approaches, such as stimulating neuromodulatory  
400 projection neurons, and computational modeling is necessary.

401 Finally, all our experiments were done with voltage-clamp steps in order to characterize  
402 the neuromodulatory effects on each target. However, such experiments mask the interactions  
403 among circuit components, both those within neurons and those with their synaptic partners.  
404 One such example is shown in (Zhao et al., 2011) for the LP to PD synapse, where Proc changes  
405 two factors: it enhances both the burst voltage waveform of the presynaptic LP neuron and the  
406 amplitude of the synaptic current. When the LP neuron is voltage clamped with the pre-  
407 recorded realistic control or Proc voltage waveforms, the resulting synaptic currents are similar  
408 in control saline, but different in the presence of Proc. This indicates that the first factor  
409 (change in the LP waveform) produces a meaningful effect only in conjunction with the second  
410 factor (direct enhancement of synaptic release). Exploring such interactions among cellular or  
411 circuit components is important in understanding the functional consequences of co-  
412 modulation and requires further experiments and computational modeling.

## 413 Conclusions

414 The persistent actions of neuromodulators are critical for proper circuit function and  
415 plasticity. Because neuromodulators do not act independently, understanding their interactions  
416 at different concentrations is fundamentally important for the understanding of circuit  
417 dynamics and resulting behaviors. Identifying the mechanisms of co-modulation also provides  
418 mechanistic guidance for therapies that target one or more neuromodulatory pathways  
419 (Engineer et al., 2011; Pena et al., 2014; Freret et al., 2017). Here, we made a first step towards  
420 the goal of understanding how neuromodulators interact to shape the circuit output, by  
421 quantitatively clarifying the co-modulatory rules at target level. Given co-modulation is a  
422 universal and evolutionarily conserved strategy, our results can provide insights and new  
423 hypothesis to test at system level. We also provide an initial framework to test similar rules in  
424 other circuit components, other neuromodulators and other systems. However, the challenge  
425 will remain to translate findings from the level of ionic currents to the effects of co-modulation  
426 on actual synaptic function and neuronal excitability, and from there to circuit activity. Even in  
427 small circuits with identified neurons, as the pyloric circuit used here, this will require a  
428 multipronged approach, combining multiple experimental and computational methods (Nadim  
429 and Bucher, 2014).

430

## 431 Materials and Methods

### 432 Preparation and electrophysiological recordings

433 All experiments were done on wild-caught adult male crabs (*Cancer borealis*) purchased  
434 from local seafood stores. Prior to experiments, animals were kept in artificial sea water tanks  
435 at 13 °C. Before dissection, crabs were anesthetized by placing on ice for at least 30 min. The  
436 STNS was dissected out following standard protocols (Blitz et al., 2004; Tohidi and Nadim,  
437 2009), placed in a Petri dish coated with clear silicon elastomer (Sylgard 184; Dow Corning;  
438 Midland, MI) and superfused with *C. borealis* saline, containing (in mM) 11 KCl, 440 NaCl, 13  
439 CaCl<sub>2</sub>, 26 MgCl<sub>2</sub>, 11.2 Trizma base, and 5.1 maleic acid (pH =7.4 –7.5). A petroleum jelly well was  
440 built around the STG for constant superfusion of chilled (10-12 °C) saline during the experiment.

441 For neuron identification, extracellular motor nerve recordings were obtained with a  
442 differential AC amplifier (A-M Systems, Model 1700; Sequim, WA), using stainless-steel pin wire  
443 electrodes placed inside and outside of small petroleum jelly wells built around the nerves.  
444 Intracellular recordings and voltage clamp were done with Axoclamp 900A amplifiers  
445 (Molecular Devices; San Jose, CA). The STG was desheathed and the neuron somata were  
446 impaled with sharp glass electrodes, pulled with a Flaming-Brown P-97 Puller (Sutter  
447 Instruments; Novato, CA) and filled with 0.6 M K<sub>2</sub>SO<sub>4</sub> + 20 mM KCl solution (15-30 MΩ electrode  
448 resistance). Neurons were identified by their characteristic intracellular waveforms and by

449 matching their activities to the spikes on the corresponding motor nerves. All  
450 electrophysiological data were digitized at 5-10 KHz with a Digidata 1440A data acquisition  
451 board (Molecular Devices).

## 452 Neuromodulatory effects on the strength and dynamics of the synaptic currents

453 The neuromodulatory effects on strength and short-term plasticity of the graded  
454 component of both the LP to PD and the PD to LP synapses were measured with simultaneous  
455 dual two-electrode voltage clamp recordings of the PD and LP neurons.

456 In voltage clamp experiments, 10 nM tetrodotoxin citrate (TTX; Biotium; Fremont, CA)  
457 saline was bath applied to block action potentials and descending neuromodulatory inputs. The  
458 synaptic current was measured as the current elicited in the postsynaptic neuron (held at -50  
459 mV), in response to depolarizing 500-1000 ms voltage steps in the presynaptic neuron (from a  
460 holding potential of -60 mV to 0 mV, in 10 mV steps; Figure 1 B and C). The postsynaptic  
461 current reported in this study is the mean value of the current during the first 500 ms of the  
462 presynaptic pulse (the postsynaptic current integral divided by the presynaptic voltage step  
463 duration of 500 ms). **The peak values of the synaptic currents during each voltage step are**  
464 **included in Figure 2–source data.**

465 To fit the postsynaptic current amplitude as a function of presynaptic voltage ( $V_{pre}$ ), we  
466 used a sigmoid function of the following form:

$$467 \quad I_{syn} = \frac{I_{max}}{1 + \exp\left(-\frac{V_{pre} - V_{mid}}{V_c}\right)} \quad (1)$$

468 In these fits, we assumed that the postsynaptic current was 0 at  $V_{pre} = -70$  mV.

469 Proc (Bachem; Torrance, CA and Genscript; Piscataway, NJ) and CCAP (Bachem) were  
470 aliquoted in 1 mM stock solutions and stored at -20 °C until use. For each experiment, the  
471 aliquots were further diluted to the desired concentrations. The dose-dependent effect of Proc  
472 or CCAP on synapses was measured by bath applying each peptide from low to high  
473 concentration (1 nM to 1  $\mu$ M) with a four-minute interval between each concentration. We  
474 considered 1  $\mu$ M to be the saturation concentration of both Proc and CCAP based on previous  
475 studies (Zhao et al., 2011). In addition, 1 $\mu$ M Proc and CCAP were co-applied at the end of each  
476 experiment to measure the maximum modulatory effect.

477 To measure short-term synaptic plasticity, we voltage clamped the presynaptic neuron  
478 at a holding potential of -60 mV and applied a set of five 500 ms identical depolarizing square  
479 pulses, from -60 to -20mV, at 1Hz. We measured the mean current amplitude in the  
480 postsynaptic neuron (voltage clamped at -50 mV) in response to each pulse. The level of short-

481 term plasticity was quantified as the ratio of the postsynaptic current amplitude elicited by the  
482 fifth and first pulses. For the experiments that had two repeated measurements, we averaged  
483 the two measurements.

#### 484 Neuromodulatory effects on the voltage-gated ionic current $I_{MI}$

485 The modulator-activated inward current  $I_{MI}$  was measured in the LP neuron in the same  
486 experiments in which we measured the LP to PD synaptic current. Because, in these  
487 experiments, the LP neuron membrane potential was stepped from -60 to 0 mV for measuring  
488 the LP to PD synapse (using the current measured in the postsynaptic PD neuron), the same  
489 voltage steps could be used to estimate  $I_{MI}$  in the LP neuron (using the voltage-clamp current,  
490  $I_{LP}$ , injected in the presynaptic LP neuron).  $I_{MI}$  was measured as the difference between  $I_{LP}$   
491 measured in the presence of the modulator and  $I_{LP}$  measured in control saline (Figure 8A)  
492 (Golowasch and Marder, 1992).  $I_{MI}$  is a non-inactivating current (Golowasch and Marder, 1992;  
493 Gray et al., 2017). To reduce errors due to differences in transient currents, we reported the  
494 mean value of the difference current, measured in the second half of each voltage pulse where  
495 the currents had reached approximate steady state. The  $I_{MI}$  value at -15 mV was measured as  
496 the average of the currents elicited at -20 mV and -10 mV step voltage and used for analysis.

497  $I_{MI}$  is a non-inactivating fast voltage-gated inward current whose activation curve is a  
498 simple Boltzmann sigmoidal equation (Goaillard et al., 2009). The IV curve of  $I_{MI}$  can therefore  
499 be estimated as

$$500 \quad I_{MI} = \frac{g_{max}(V_{LP} - E_{MI})}{1 + \exp\left(-\frac{V_{LP} - V_{mid}}{V_c}\right)} + I_0 \quad (2)$$

501 where  $g_{max}$  is the maximum conductance of  $I_{MI}$ ,  $E_{MI}$  is the reversal potential and  $I_0$  is the  
502 baseline difference current.

503 The dose-dependent effects of the modulators and the protocols for co-modulation of  
504  $I_{MI}$  were the same as those described for the synapses above.

#### 505 Constructing predictors for single neuromodulators

506 For each neuromodulator-synapse pair, we fit a surface to the postsynaptic currents  
507 measured at all presynaptic voltages and concentrations in multiple experiments. The equation  
508 used to define this surface was a dual sigmoidal function of both the presynaptic voltage ( $V_{pre}$ )  
509 and the log peptide concentration ( $C$ ). This equation was based on equation (1), so that

$$I(V_{pre}, C) = \frac{I_{max}(C)}{1 + \exp\left(-\frac{V_{pre} - V_{mid}(C)}{V_c(C)}\right)}, \text{ where,}$$

$$I_{max}(C) = a_1 + \frac{a_2}{1 + \exp\left(\frac{C - C_{mid}}{C_c}\right)}$$

$$V_{mid}(C) = a_3 + \frac{a_4}{1 + \exp\left(\frac{C - C_{mid}}{C_c}\right)}$$

$$V_c(C) = a_5 + \frac{a_6}{1 + \exp\left(\frac{C - C_{mid}}{C_c}\right)}.$$

510 (3)

511 In these fits, the unit of peptide concentration is M, and the control value was set at  $C = -10$ ,  
 512 thus assuming that  $10^{-10}$  M concentration had no effect. The enhancement functions for each  
 513 peptide were defined as the increase produced by the modulator above the control level of the  
 514 synaptic current at each presynaptic voltage:

$$515 \quad E(V_{pre}, C) = I(V_{pre}, C) - I_{Ctrl}(V_{pre}) \quad (4)$$

516 The resulting enhancement functions served as predictors for the effect of the neuromodulator  
 517 on the postsynaptic current at any voltage and concentration.

518 In the case of  $I_{MI}$ , we fit the dose-dependent effects of Proc and CCAP with the sigmoidal  
 519 curve

$$520 \quad I_{MI} = \frac{I_{max}}{1 + \exp\left(-\frac{C - C_{mid}}{C_c}\right)} \quad (5)$$

521 where  $C$  is the log peptide concentration and  $C_{mid}$  and  $C_c$  are, respectively, the half-maximum  
 522 log concentration and the slope factor. In these fits, the unit of peptide concentration is M, and  
 523 the control value was set at  $C = -10$ , assuming that  $10^{-10}$  M concentration had no effect.

## 524 Predicting and testing co-modulation

525 We compared the predictions of co-modulation effects with the experimental data from  
 526 co-applications of Proc and CCAP in 18 different combinations of concentrations for both the LP  
 527 to PD and PD to LP synapses and  $I_{MI}$  in the LP neuron. These 18 combinations were divided into  
 528 four separate groups of experiments, with each group only containing four or five combinations  
 529 (group information can be found in Figure 6- Figure supplement). In each group of experiments,



530 each peptide was applied in order from lower to higher concentration. Each combination was  
 531 bath applied for a four-minute-interval, a value calculated by the superfusion rate, the volume  
 532 of solution in the line and the size of the petroleum jelly well around the STG. At the end of  
 533 each experiment, Proc and CCAP were co-applied at 1  $\mu$ M each to record the maximum  
 534 modulatory effect in that preparation.

535 The predictions for synapses were calculated by adding up the enhancements produced  
 536 by each peptide at the respective concentrations (obtained from equation (4)) and the control  
 537 value ( $I_{Ctrl\_co-mod}$ ), and limiting the sum to the saturation level ( $I_{sat\_co-mod}$ ), which is the synaptic  
 538 current elicited by both peptides co-applied at 1 $\mu$ M.

$$539 \quad I_{co-mod} = \begin{cases} E_{Proc} + E_{CCAP} + I_{Ctrl\_co-mod} & \text{if } \leq I_{sat\_co-mod} \\ I_{sat\_co-mod} & \text{otherwise} \end{cases} \quad (6)$$

540 For each combination, we measured the co-modulated synaptic currents, as described  
 541 above, at presynaptic voltages from -60 mV to 0 mV, in 10 mV steps. We then compared the  
 542 measurement with the prediction for those voltages.

543 The co-modulation predictions for  $I_{MI}$  were calculated by simply adding up the value of  
 544  $I_{MI}$  activated by each modulator at its respective concentration on the dose-response curve,  
 545 limited to the saturation level.

$$546 \quad I_{MI-co-mod} = \begin{cases} I_{MI-Proc} + I_{MI-CCAP} & \text{if } \leq I_{sat\_co-mod} \\ I_{sat\_co-mod} & \text{otherwise} \end{cases} \quad (7)$$

547 To estimate how well our model prediction fit the experimental results, we used two  
 548 standard goodness-of-fit tests. One of these measures is the coefficient of determination  $R^2$   
 549 measured as:  $R^2 = 1 - \frac{SSR}{SST}$ , where  $SSR = \sum_{i=1}^n (pred_i - meas_i)^2$  is the summed square of the residuals

550 and  $SST = \sum_{i=1}^n (meas_i - meas_{avg})^2$  is the total sum of squares.  $R^2 = 1$  means that the prediction  
 551 perfectly captures the trend of the data. Note, however, that this  $R^2$  is different from the  
 552 Pearson correlation coefficient where a linear fit to the data is evaluated. In our case,  $R^2$  may be  
 553  $< 0$ , which simply indicates that the mean of the data  $meas_{avg}$  provides a better prediction than  
 554 the model.

555 The second measure we use is the normalized root mean squared error (NRMSE,  
 556 normalized to standard deviation), calculated as  $NRMSE = \frac{1}{\sigma_{meas}} \sqrt{\frac{SSR}{n}}$ . A value of 0 for NRMSE  
 557 indicates a perfect fit, whereas values  $> 1$  indicate that the mean of the data  $meas_{avg}$  provides a  
 558 better prediction than the model.

559           We report both  $R^2$  and NRMSE as recommended by Schunn and Wallach (Schunn and  
560 Wallach, 2005) to show that our prediction captures both the trend of the data and how far it  
561 deviates from the exact data points. Specifically,  $R^2$  evaluates whether the model prediction  
562 captures the trend of the data, whereas, NRMSE evaluates the deviation of the data from the  
563 prediction.

#### 564 **Data analysis and statistical analysis**

565           All data and statistical analysis were done with Matlab (MathWorks, 2015b; Natick, MA)  
566 and R (The R Foundation). Unless otherwise indicated, all error bars represent standard error of  
567 the mean. Statistical tests included Student's t-test, One- or Two-way RM ANOVA (followed by  
568 post hoc pairwise comparisons done with the Tukey method, when applicable). Critical  
569 significance level was set to  $\alpha=0.05$ . Comparisons between model prediction and the data were  
570 done by reporting the adjusted  $R^2$  and normalized root mean square error (NRMSE) analysis, as  
571 described above.

## 572 References

- 573 Arrigoni E, Saper CB (2014) What optogenetic stimulation is telling us (and failing to tell us)  
574 about fast neurotransmitters and neuromodulators in brain circuits for wake-sleep  
575 regulation. *Curr Opin Neurobiol* 29:165-171.
- 576 Asahina K (2017) Neuromodulation and Strategic Action Choice in *Drosophila* Aggression. *Annu*  
577 *Rev Neurosci* 40:51-75.
- 578 Bargmann CI (2012) Beyond the connectome: how neuromodulators shape neural circuits.  
579 *Bioessays* 34:458-465.
- 580 Beliez L, Barriere G, Bertrand SS, Cazalets JR (2014) Multiple monoaminergic modulation of  
581 posturo-locomotor network activity in the newborn rat spinal cord. *Front Neural Circuits*  
582 8:99.
- 583 Blitz DM, Beenhakker MP, Nusbaum MP (2004) Different sensory systems share projection  
584 neurons but elicit distinct motor patterns. *J Neurosci* 24:11381-11390.
- 585 Brezina V (2010) Beyond the wiring diagram: signalling through complex neuromodulator  
586 networks. *Philos Trans R Soc Lond B Biol Sci* 365:2363-2374.
- 587 Brezina V, Orekhova IV, Weiss KR (1996) Functional uncoupling of linked neurotransmitter  
588 effects by combinatorial convergence. *Science (New York, NY)* 273:806-810.
- 589 Bucher D, Prinz AA, Marder E (2005) Animal-to-animal variability in motor pattern production in  
590 adults and during growth. *J Neurosci* 25:1611-1619.
- 591 Burke PG, Kanbar R, Basting TM, Hodges WM, Viar KE, Stornetta RL, Guyenet PG (2015) State-  
592 dependent control of breathing by the retrotrapezoid nucleus. *J Physiol* 593:2909-2926.
- 593 Caers J, Verlinden H, Zels S, Vandersmissen HP, Vuerinckx K, Schoofs L (2012) More than two  
594 decades of research on insect neuropeptide GPCRs: an overview. *Frontiers in*  
595 *endocrinology* 3:151.
- 596 Cohn R, Morantte I, Ruta V (2015) Coordinated and Compartmentalized Neuromodulation  
597 Shapes Sensory Processing in *Drosophila*. *Cell* 163:1742-1755.
- 598 Daaka Y (2012) S-nitrosylation-regulated GPCR signaling. *Biochimica et biophysica acta*  
599 1820:743-751.
- 600 Daur N, Nadim F, Bucher D (2016) The complexity of small circuits: the stomatogastric nervous  
601 system. *Curr Opin Neurobiol* 41:1-7.
- 602 Dickinson PS, Fairfield WP, Hetling JR, Hauptman J (1997) Neurotransmitter interactions in the  
603 stomatogastric system of the spiny lobster: one peptide alters the response of a central  
604 pattern generator to a second peptide. *J Neurophysiol* 77:599-610.
- 605 Djokaj S, Cooper RL, Rathmayer W (2001) Presynaptic effects of octopamine, serotonin, and  
606 cocktails of the two modulators on neuromuscular transmission in crustaceans. *J Comp*  
607 *Physiol A* 187:145-154.
- 608 Doi A, Ramirez JM (2008) Neuromodulation and the orchestration of the respiratory rhythm.  
609 *Respir Physiol Neurobiol* 164:96-104.
- 610 Donlea JM, Alam MN, Szymusiak R (2017) Neuronal substrates of sleep homeostasis; lessons  
611 from flies, rats and mice. *Curr Opin Neurobiol* 44:228-235.
- 612 Eisen JS, Marder E (1984) A mechanism for production of phase shifts in a pattern generator. *J*  
613 *Neurophysiol* 51:1375-1393.

- 614 Engineer ND, Riley JR, Seale JD, Vrana WA, Shetake JA, Sudanagunta SP, Borland MS, Kilgard MP  
615 (2011) Reversing pathological neural activity using targeted plasticity. *Nature* 470:101-  
616 104.
- 617 Filosa A, Barker AJ, Dal Maschio M, Baier H (2016) Feeding State Modulates Behavioral Choice  
618 and Processing of Prey Stimuli in the Zebrafish Tectum. *Neuron* 90:596-608.
- 619 Freret T, Lelong-Boulouard V, Lecouflet P, Hamidouche K, Dauphin F, Boulouard M (2017) Co-  
620 modulation of an allosteric modulator of nicotinic receptor-cholinesterase inhibitor  
621 (galantamine) and a 5-HT<sub>4</sub> receptor agonist (RS-67333): effect on scopolamine-induced  
622 memory deficit in the mouse. *Psychopharmacology (Berl)* 234:2365-2374.
- 623 Garcia VJ, Daur N, Temporal S, Schulz DJ, Bucher D (2015) Neuropeptide Receptor Transcript  
624 Expression Levels and Magnitude of Ionic Current Responses Show Cell Type-Specific  
625 Differences in a Small Motor Circuit. *Journal of Neuroscience* 35:6786-6800.
- 626 Goillard JM, Taylor AL, Schulz DJ, Marder E (2009) Functional consequences of animal-to-  
627 animal variation in circuit parameters. *Nat Neurosci* 12:1424-1430.
- 628 Golowasch J, Marder E (1992) Ionic currents of the lateral pyloric neuron of the stomatogastric  
629 ganglion of the crab. *J Neurophysiol* 67:318-331.
- 630 Golowasch J, Abbott LF, Marder E (1999) Activity-dependent regulation of potassium currents  
631 in an identified neuron of the stomatogastric ganglion of the crab *Cancer borealis*. *J*  
632 *Neurosci* 19:RC33.
- 633 Gray M, Daudelin DH, Golowasch J (2017) Activation mechanism of a neuromodulator-gated  
634 pacemaker ionic current. *J Neurophysiol* 118:595-609.
- 635 Harris-Warrick RM (2011) Neuromodulation and flexibility in Central Pattern Generator  
636 networks. *Curr Opin Neurobiol* 21:685-692.
- 637 Harris-Warrick RM, Johnson BR (2010) Checks and balances in neuromodulation. *Front Behav*  
638 *Neurosci* 4.
- 639 He K, Huertas M, Hong SZ, Tie X, Hell JW, Shouval H, Kirkwood A (2015) Distinct Eligibility Traces  
640 for LTP and LTD in Cortical Synapses. *Neuron* 88:528-538.
- 641 Hooper SL, Marder E (1987) Modulation of the lobster pyloric rhythm by the peptide proctolin. *J*  
642 *Neurosci* 7:2097-2112.
- 643 Inagaki HK, Panse KM, Anderson DJ (2014) Independent, reciprocal neuromodulatory control of  
644 sweet and bitter taste sensitivity during starvation in *Drosophila*. *Neuron* 84:806-820.
- 645 Leclerc PC, Lanctot PM, Auger-Messier M, Escher E, Leduc R, Guillemette G (2006) S-  
646 nitrosylation of cysteine 289 of the AT<sub>1</sub> receptor decreases its binding affinity for  
647 angiotensin II. *British journal of pharmacology* 148:306-313.
- 648 Li B, Beeman RW, Park Y (2011) Functions of duplicated genes encoding CCAP receptors in the  
649 red flour beetle, *Tribolium castaneum*. *J Insect Physiol* 57:1190-1197.
- 650 Lovett-Barron M, Andalman AS, Allen WE, Vesuna S, Kauvar I, Burns VM, Deisseroth K (2017)  
651 Ancestral Circuits for the Coordinated Modulation of Brain State. *Cell* 171:1411-1423  
652 e1417.
- 653 Lur G, Higley MJ (2015) Glutamate Receptor Modulation Is Restricted to Synaptic  
654 Microdomains. *Cell reports* 12:326-334.
- 655 Manor Y, Nadim F (2001) Synaptic depression mediates bistability in neuronal networks with  
656 recurrent inhibitory connectivity. *J Neurosci* 21:9460-9470.
- 657 Marder E (2012) Neuromodulation of neuronal circuits: back to the future. *Neuron* 76:1-11.

- 658 Marder E, Bucher D (2007) Understanding circuit dynamics using the stomatogastric nervous  
659 system of lobsters and crabs. *Annual review of physiology* 69:291-316.
- 660 Marder E, Goeritz ML, Otopalik AG (2015) Robust circuit rhythms in small circuits arise from  
661 variable circuit components and mechanisms. *Curr Opin Neurobiol* 31:156-163.
- 662 McCormick DA, Williamson A (1989) Convergence and divergence of neurotransmitter action in  
663 human cerebral cortex. *Proc Natl Acad Sci U S A* 86:8098-8102.
- 664 McCormick DA, Pape HC (1990) Noradrenergic and serotonergic modulation of a  
665 hyperpolarization-activated cation current in thalamic relay neurones. *J Physiol* 431:319-  
666 342.
- 667 Mena W, Diegelmann S, Wegener C, Ewer J (2016) Stereotyped responses of *Drosophila*  
668 peptidergic neuronal ensemble depend on downstream neuromodulators. *Elife*  
669 5:e19686.
- 670 Mesce KA, Crisp KM, Gilchrist LS (2001) Mixtures of octopamine and serotonin have  
671 nonadditive effects on the CNS of the medicinal leech. *J Neurophysiol* 85:2039-2046.
- 672 Mirabeau O, Joly JS (2013) Molecular evolution of peptidergic signaling systems in bilaterians.  
673 *Proc Natl Acad Sci U S A* 110:E2028-2037.
- 674 Nadim F, Bucher D (2014) Neuromodulation of neurons and synapses. *Curr Opin Neurobiol*  
675 29:48-56.
- 676 Nusbaum MP, Blitz DM, Marder E (2017) Functional consequences of neuropeptide and small-  
677 molecule co-transmission. *Nat Rev Neurosci* 18:389-403.
- 678 Park JY, Spruston N (2012) Synergistic actions of metabotropic acetylcholine and glutamate  
679 receptors on the excitability of hippocampal CA1 pyramidal neurons. *J Neurosci*  
680 32:6081-6091.
- 681 Parker D (2000) Presynaptic and interactive peptidergic modulation of reticulospinal synaptic  
682 inputs in the lamprey. *J Neurophysiol* 83:2497-2507.
- 683 Pena DF, Childs JE, Willett S, Vital A, McIntyre CK, Kroener S (2014) Vagus nerve stimulation  
684 enhances extinction of conditioned fear and modulates plasticity in the pathway from  
685 the ventromedial prefrontal cortex to the amygdala. *Front Behav Neurosci* 8:327.
- 686 Rabbah P, Nadim F (2005) Synaptic dynamics do not determine proper phase of activity in a  
687 central pattern generator. *J Neurosci* 25:11269-11278.
- 688 Richter C, Woods IG, Schier AF (2014) Neuropeptidergic control of sleep and wakefulness. *Annu*  
689 *Rev Neurosci* 37:503-531.
- 690 Schulz DJ, Goillard JM, Marder E (2006) Variable channel expression in identified single and  
691 electrically coupled neurons in different animals. *Nat Neurosci* 9:356-362.
- 692 Schulz DJ, Goillard JM, Marder EE (2007) Quantitative expression profiling of identified  
693 neurons reveals cell-specific constraints on highly variable levels of gene expression.  
694 *Proc Natl Acad Sci U S A* 104:13187-13191.
- 695 Schunn CD, Wallach D (2005) Evaluating Goodness-of-Fit in Comparison of Models to Data. In:  
696 *Psychologie der Kognition Reden und Vorträge anlässlich der Emeritierung von Werner*  
697 *H. Tack: Saarbrücken Univ.-Präsidentin.*
- 698 Shahidi R, Williams EA, Conzelmann M, Asadulina A, Veraszto C, Jasek S, Bezares-Calderon LA,  
699 Jekely G (2015) A serial multiplex immunogold labeling method for identifying  
700 peptidergic neurons in connectomes. *Elife* 4:e11147.

- 701 Smith NJ, Milligan G (2010) Allosterity at G Protein-Coupled Receptor Homo- and Heteromers:  
702 Uncharted Pharmacological Landscapes. *Pharmacological Reviews* 62:701-725.
- 703 Su J, Sandor K, Skold K, Hokfelt T, Svensson CI, Kultima K (2014) Identification and quantification  
704 of neuropeptides in naive mouse spinal cord using mass spectrometry reveals [des-  
705 Ser1]-cerebellin as a novel modulator of nociception. *J Neurochem* 130:199-214.
- 706 Svensson E, Grillner S, Parker D (2001) Gating and braking of short- and long-term modulatory  
707 effects by interactions between colocalized neuromodulators. *Journal of Neuroscience*  
708 21:5984-5992.
- 709 Swensen AM, Marder E (2000) Multiple peptides converge to activate the same voltage-  
710 dependent current in a central pattern-generating circuit. *J Neurosci* 20:6752-6759.
- 711 Swensen AM, Marder E (2001) Modulators with convergent cellular actions elicit distinct circuit  
712 outputs. *J Neurosci* 21:4050-4058.
- 713 Taghert PH, Nitabach MN (2012) Peptide neuromodulation in invertebrate model systems.  
714 *Neuron* 76:82-97.
- 715 Thirumalai V, Marder E (2002) Colocalized neuropeptides activate a central pattern generator  
716 by acting on different circuit targets. *J Neurosci* 22:1874-1882.
- 717 Thirumalai V, Prinz AA, Johnson CD, Marder E (2006) Red pigment concentrating hormone  
718 strongly enhances the strength of the feedback to the pyloric rhythm oscillator but has  
719 little effect on pyloric rhythm period. *J Neurophysiol* 95:1762-1770.
- 720 Tohidi V, Nadim F (2009) Membrane resonance in bursting pacemaker neurons of an oscillatory  
721 network is correlated with network frequency. *J Neurosci* 29:6427-6435.
- 722 Tseng HA, Nadim F (2010) The membrane potential waveform of bursting pacemaker neurons is  
723 a predictor of their preferred frequency and the network cycle frequency. *J Neurosci*  
724 30:10809-10819.
- 725 van den Pol AN (2012) Neuropeptide transmission in brain circuits. *Neuron* 76:98-115.
- 726 Wester JC, McBain CJ (2014) Behavioral state-dependent modulation of distinct interneuron  
727 subtypes and consequences for circuit function. *Curr Opin Neurobiol* 29:118-125.
- 728 White RS, Spencer RM, Nusbaum MP, Blitz DM (2017) State-dependent sensorimotor gating in a  
729 rhythmic motor system. *J Neurophysiol* 118:2806-2818.
- 730 Woods IG, Schoppik D, Shi VJ, Zimmerman S, Coleman HA, Greenwood J, Soucy ER, Schier AF  
731 (2014) Neuropeptidergic signaling partitions arousal behaviors in zebrafish. *J Neurosci*  
732 34:3142-3160.
- 733 Xia XB, Mills SL (2004) Gap junctional regulatory mechanisms in the All amacrine cell of the  
734 rabbit retina. *Vis Neurosci* 21:791-805.
- 735 Yamazoe-Umemoto A, Fujita K, Iino Y, Iwasaki Y, Kimura KD (2015) Modulation of different  
736 behavioral components by neuropeptide and dopamine signalings in non-associative  
737 odor learning of *Caenorhabditis elegans*. *Neurosci Res* 99:22-33.
- 738 Zhao S, Sheibanie AF, Oh M, Rabbah P, Nadim F (2011) Peptide neuromodulation of synaptic  
739 dynamics in an oscillatory network. *J Neurosci* 31:13991-14004.

740 **Figures**

741

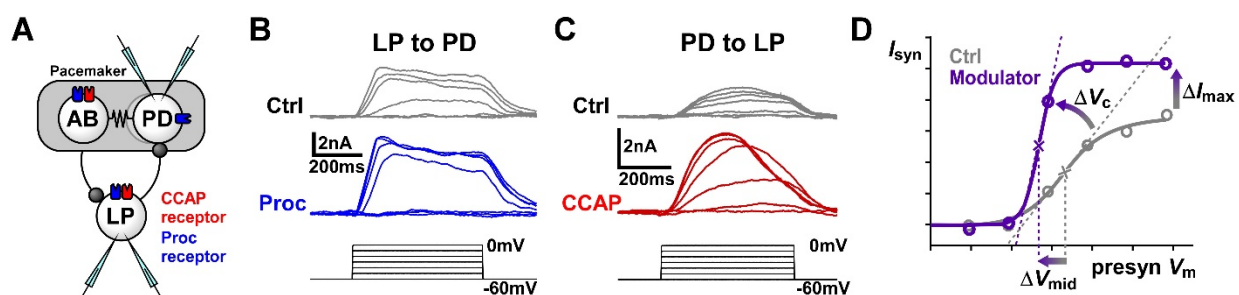

742

743 **Figure 1.**

744 CCAP and Proc modulate the strength and activation curves of the reciprocal synapses  
745 between the LP and PD neurons. **(A)** Schematic diagram of the synaptic connectivity between  
746 the electrically-coupled (resistor symbol) pyloric pacemaker neurons, AB and PD, and the  
747 follower LP neuron. Both synapses (stick-and-ball symbols) are inhibitory. Also shown are the  
748 known receptor expression for CCAP and putative receptor expression for Proc in these  
749 neurons. The experimental protocol involved simultaneous two-electrode voltage-clamp  
750 recordings of the PD and LP neurons. **(B)** Example recordings of postsynaptic currents measured  
751 in the PD neuron in response to voltage steps in the presynaptic LP neuron in control saline  
752 (Ctrl) and in the presence of 1 μM Proc. Measurements were done in 0.1 μM TTX. **(C)** Example  
753 recordings of synaptic currents measured in the LP neuron in response to voltage steps in the  
754 presynaptic PD neuron in control saline (Ctrl) and in the presence of 1 μM CCAP. Measurements  
755 were done in 0.1 μM TTX. **(D)** To measure the modulatory effects, the mean value of the  
756 postsynaptic currents was plotted against the presynaptic voltage and fit with a Boltzmann type  
757 sigmoidal function. Changes in maximum synaptic current ( $I_{max}$ ), half-activation voltage ( $V_{mid}$ )  
758 and slope factor ( $V_c$ ) were compared in control and in the presence of the modulator.

759 **Figure 2.**

760 CCAP and Proc modulate the synapses  
 761 between the LP and PD neurons in a  
 762 dose-dependent manner. **(A)** Both CCAP  
 763 and Proc increase the amplitude of the  
 764 LP to PD postsynaptic current ( $I_{syn}$ ). Top  
 765 panels show mean and SEM of  $I_{syn}$  as  
 766 well as sigmoidal fits for control and  
 767 modulators applied at the maximum  
 768 concentration of 1  $\mu$ M. As the applied  
 769 concentration is increased, CCAP  
 770 increases  $I_{max}$  ( $p < 0.0001$ ), decreases the  
 771 slope factor  $V_c$  ( $p < 0.001$ ) and decreases  
 772  $V_{mid}$  ( $p < 0.0001$ ). (All tests One-Way RM-  
 773 ANOVA,  $N=5$ .) Proc has a similar effect  
 774 on these three parameters ( $p < 0.0001$   
 775 for  $I_{max}$  and  $V_c$ ,  $p=0.0047$  for  $V_{mid}$ , One-  
 776 Way RM-ANOVA,  $N=6$ ). **(B)** As the  
 777 applied concentration increases, CCAP,  
 778 but not Proc, increases the amplitude of  
 779 the PD to LP synapse. Top panels as in  
 780 A. CCAP increases  $I_{max}$  ( $p < 0.0001$ ), but  
 781 not  $V_{mid}$  ( $p=0.50$ ) or  $V_c$  ( $p=0.95$ ), Proc  
 782 modulates  $V_c$  ( $p < 0.0001$ ) but not  $I_{max}$   
 783 ( $p=0.22$ ) or  $V_{mid}$  ( $p=0.11$ ). All tests One-  
 784 Way RM-ANOVA,  $N=6$ . (\*\*  $p < 0.01$ , \*\*\*  
 785  $p < 0.001$ ). All raw data are provided in  
 786 [Figure 2–source data](#).

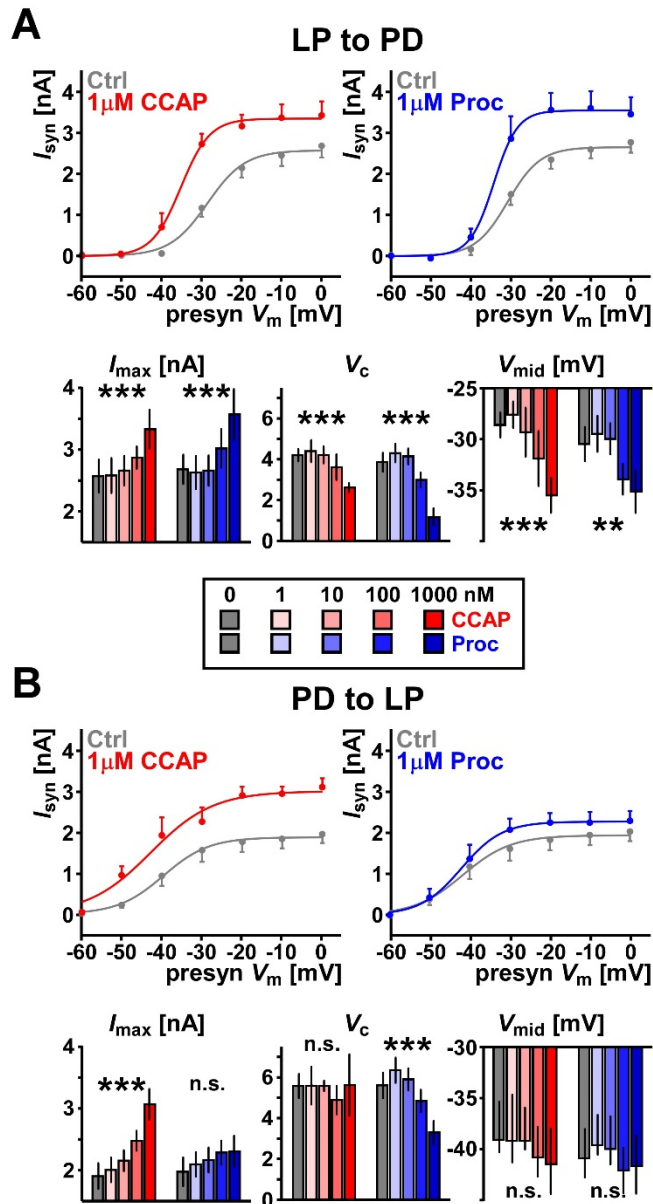



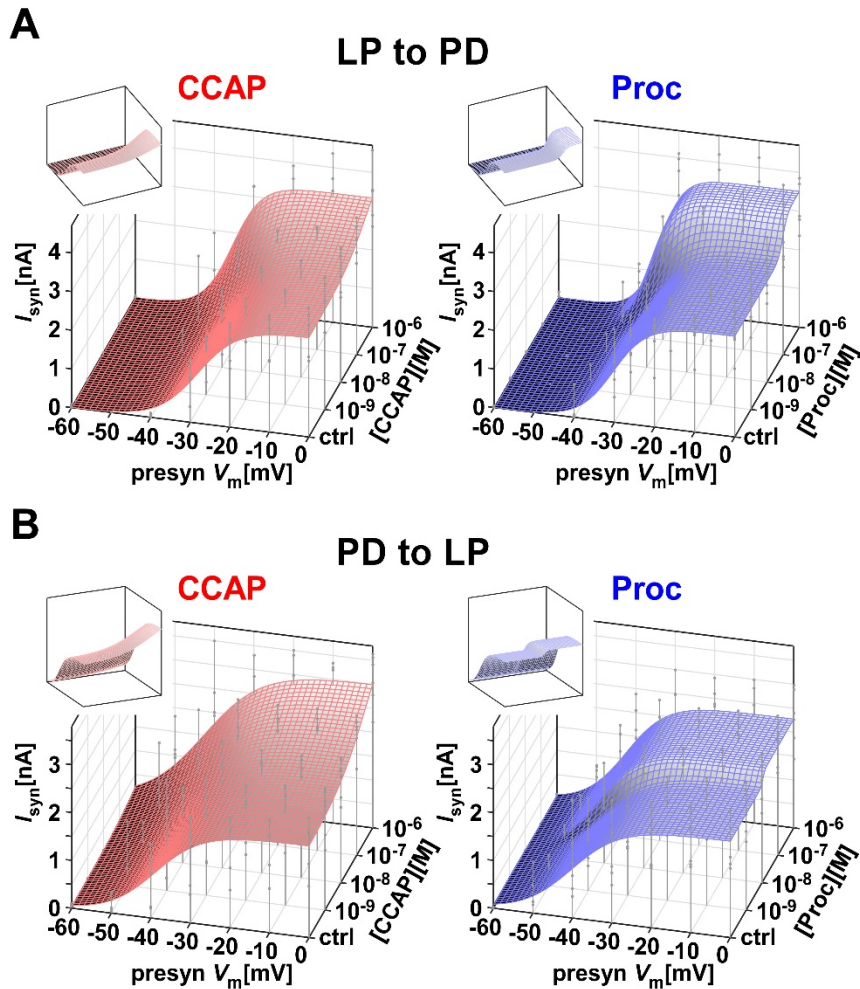

787

788 **Figure 3.**

789 The dose-dependent influence of CCAP and Proc on the activation curves of the two  
 790 synapses was used to construct predictors of modulation on synapses. **(A)** A double-sigmoidal  
 791 surface fit (equation (3)) to the activation data of the LP to PD synapse in different doses of  
 792 Proc or CCAP can be used to estimate the influence of the respective modulator on the synapse  
 793 at any presynaptic voltage and any concentration of the modulator. Droplines indicate  
 794 measurement points of the experimental data, with the filled circles marking the data points.  
 795 Insets show the same surface from a different viewpoint. **(B)** Same as (A), but for the PD to LP  
 796 synapse. The fit parameters were: panel A, CCAP:  $a_1=3.619$ ,  $a_2=-1.042$ ,  $a_3=-38.00$ ,  $a_4=9.890$ ,  
 797  $a_5=3.197$ ,  $a_6=1.920$ ,  $C_{mid}=-6.556$ ,  $C_c=0.5555$ ; panel A, Proc:  $a_1=3.508$ ,  $a_2=-0.902$ ,  $a_3=-34.68$ ,  
 798  $a_4=4.320$ ,  $a_5=2.913$ ,  $a_6=1.324$ ,  $C_{mid}=-7.018$ ,  $C_c=0.1359$ ; panel B, CCAP:  $a_1=3.632$ ,  $a_2=-1.735$ ,  $a_3=-$   
 799  $44.74$ ,  $a_4=5.82$ ,  $a_5=8.135$ ,  $a_6=-2.116$ ,  $C_{mid}=-6.455$ ,  $C_c=0.8039$ ; panel B, Proc:  $a_1=2.273$ ,  $a_2=-$   
 800  $0.2560$ ,  $a_3=-42.43$ ,  $a_4=2.090$ ,  $a_5=5.184$ ,  $a_6=1.126$ ,  $C_{mid}=-7.958$ ,  $C_c=0.04605$ .

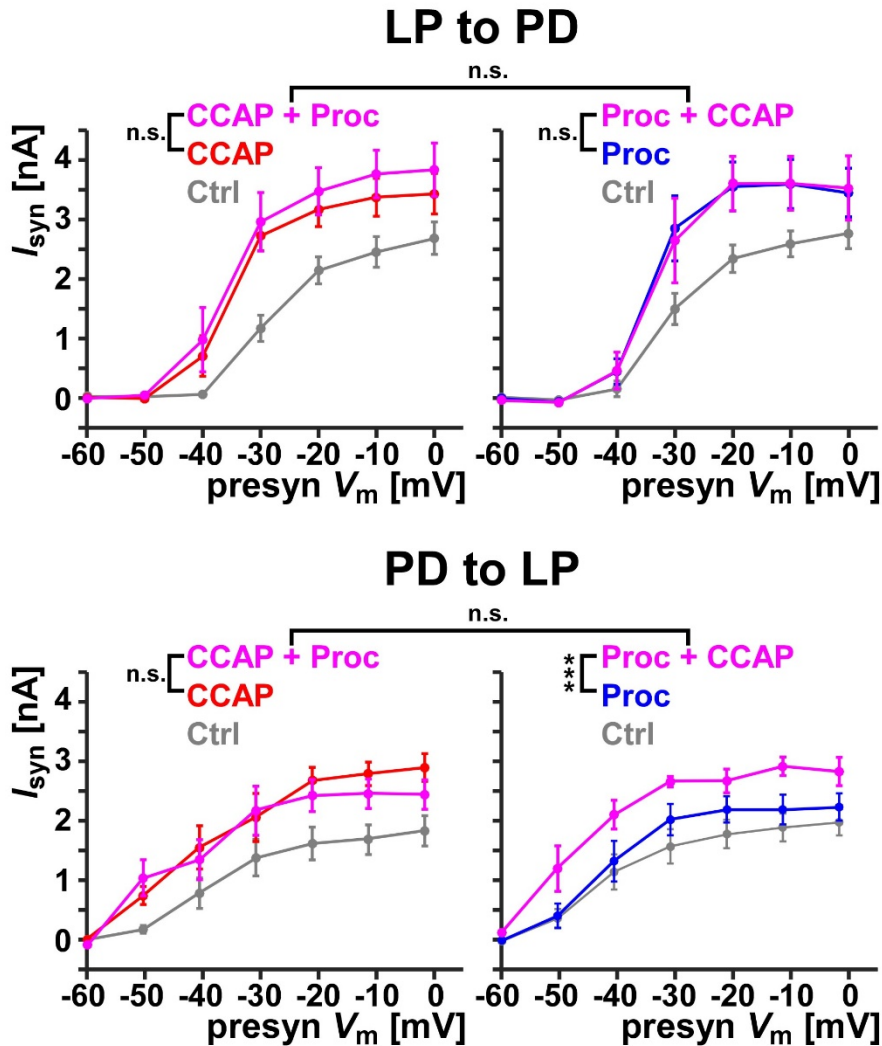

801

802 **Figure 4.**

803 Maximum co-modulation of the synaptic currents by 1  $\mu$ M CCAP and 1  $\mu$ M Proc. Each  
804 panel shows the effect of co-modulation of either synapse on the synaptic activation curve,  
805 following modulation by 1  $\mu$ M of either modulator alone. For the LP to PD synapse (top), co-  
806 modulation did not increase the synaptic current significantly compared to either CCAP alone  
807 (left,  $p=0.45$ ,  $N=5$ ) or Proc alone (right,  $p=1.0$ ,  $N=6$ ). Between the two sets of experiments (left  
808 and right panels), neither control levels ( $p=0.55$ ), nor co-modulation levels ( $p=0.68$ ) were  
809 significantly different. For the PD to LP synapse (bottom), co-modulation did not increase the  
810 synaptic current significantly compared to CCAP alone (left,  $p=0.99$ ,  $N=6$ ), but it did increase the  
811 effect of Proc alone (right,  $p < 0.0001$ ,  $N=6$ ). Once again, between the two sets of experiments  
812 (left and right panels), neither control levels ( $p=0.73$ ), nor co-modulation levels ( $p=0.47$ ) were  
813 significantly different. All statistical comparisons were Two-Way RM-ANOVA, followed by a  
814 Tukey post hoc analysis, if applicable. (\*  $p < 0.05$ , \*\*\*  $p < 0.001$ ).

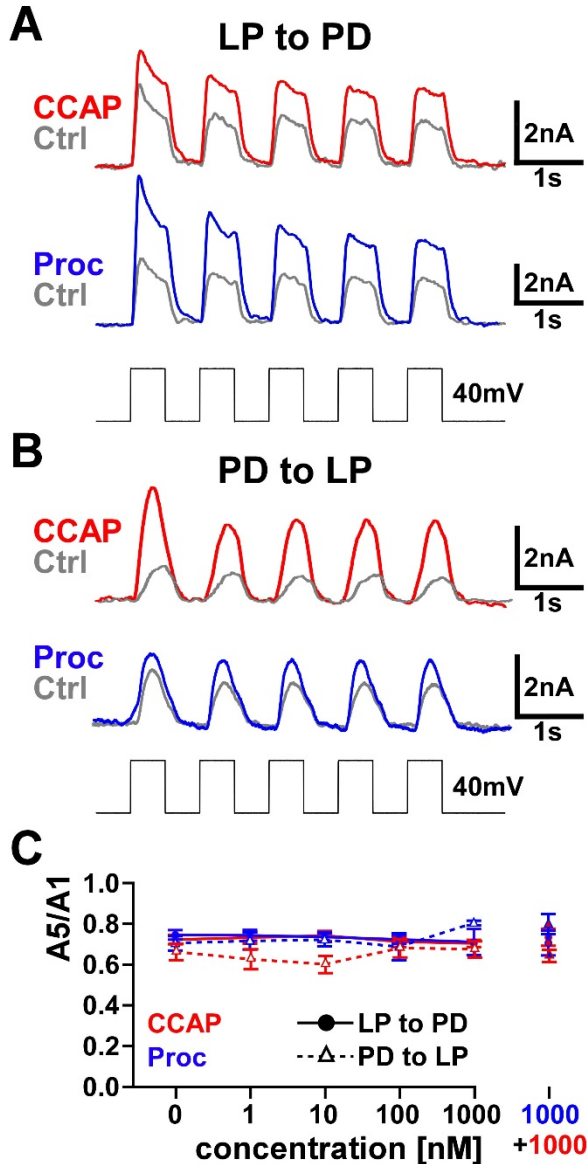

815

816 **Figure 5.**

817 CCAP, Proc or combinations of both do not modulate short-term synaptic plasticity  
818 measured with large presynaptic voltage steps. **(A, B):** Sample experimental traces showing the  
819 five postsynaptic currents (with mean amplitude Amp1-Amp5) in response to a set of five  
820 presynaptic voltage steps from -60 mV to -20 mV in control and in the presence of either  
821 modulator, for the LP to PD **(A)** and PD to LP **(B)** synapses. **(C)** Short-term synaptic plasticity was  
822 quantified as Amp5/Amp1. This ratio did not change from control to different concentrations of  
823 individual neuromodulators, or co-modulation. (LP to PD: from control to either CCAP or Proc to  
824 co-modulation,  $p=0.50$  and  $0.34$ . PD to LP: from control to either CCAP or Proc to co-  
825 modulation,  $p=0.20$  and  $0.11$ .  $N=6$  for all. All measurements One-Way RM ANOVA).

826 **Figure 6.**

827 The co-  
 828 modulatory effect of  
 829 CCAP and Proc on the LP  
 830 to PD synapse can be  
 831 predicted from linear  
 832 summation up to  
 833 saturation. **(A)** The LP to  
 834 PD synaptic current  
 835 activation curve in  
 836 response to co-applied  
 837 CCAP and Proc at four  
 838 different concentration  
 839 combinations (test, raw  
 840 and fit) is well predicted  
 841 by the model  
 842 (prediction). Also shown  
 843 is the range of synaptic  
 844 currents measured in  
 845 the respective  
 846 experiments (control to  
 847 saturation). The  $R^2$  and  
 848 NRMSE values in each  
 849 case show the goodness  
 850 of the prediction. **(B)**  
 851 The prediction values  
 852 compared with the actual  
 853 measurements for all data  
 854 points in the 18 different  
 855 combinations of co-  
 856 modulation measurements  
 857 of the LP to PD synapse.  
 858 Also shown, for compar-  
 859 ison, are the line of  
 perfect prediction ( $y=x$ )  
 and overall  $R^2$  values.  
**(C)** The  $R^2$  and NRMSE  
 values shown for each of  
 the 18 co-modulation  
 combinations of the LP  
 to PD synapse.  $R^2=1$  and  
 NRMSE=0 indicate perfect  
 predictions, whereas  
 $R^2=0$  and NRMSE=1  
 indicate that the predic-  
 tion was no better than  
 the mean of the data.  
 The bottom panel shows  
 the concentration of Proc,  
 CCAP and total concentra-  
 tion (Proc+CCAP) in each  
 case. Data are shown in  
 order of increasing total  
 concentration. Each com-  
 bination included 5-6  
 preparations.

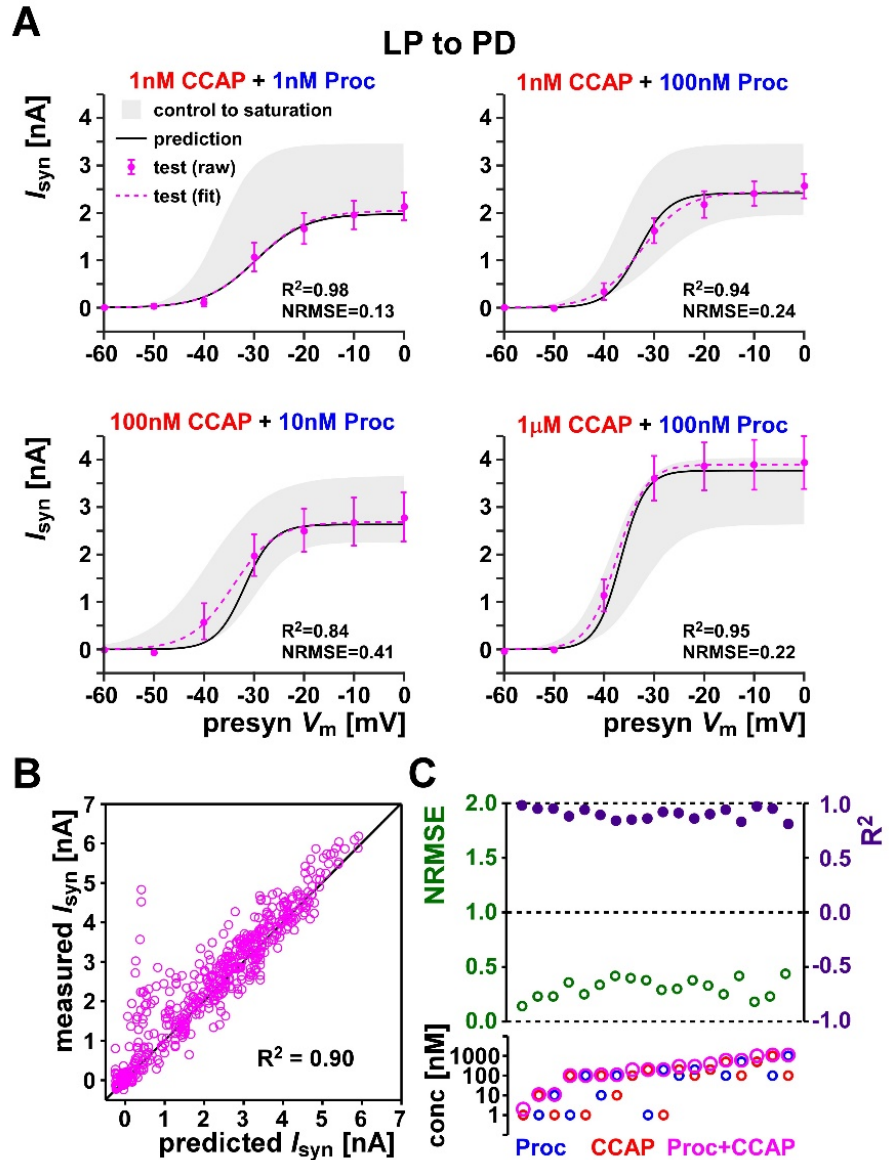

| Group           | Proc [M]           | CCAP [M]           | R <sup>2</sup> | NRMSE       |
|-----------------|--------------------|--------------------|----------------|-------------|
| 1               | 10 <sup>-9</sup>   | 10 <sup>-9</sup>   | 0.98           | 0.13        |
| 2               | 10 <sup>-9</sup>   | 10 <sup>-8</sup>   | 0.95           | 0.22        |
| 2               | 10 <sup>-9</sup>   | 10 <sup>-7</sup>   | 0.88           | 0.35        |
| 2               | 10 <sup>-9</sup>   | 2x10 <sup>-7</sup> | 0.86           | 0.37        |
| 1               | 10 <sup>-8</sup>   | 10 <sup>-9</sup>   | 0.95           | 0.22        |
| 3               | 10 <sup>-8</sup>   | 10 <sup>-9</sup>   | 0.95           | 0.22        |
| 1               | 10 <sup>-7</sup>   | 10 <sup>-9</sup>   | 0.94           | 0.24        |
| 4               | 10 <sup>-7</sup>   | 10 <sup>-8</sup>   | 0.84           | 0.41        |
| 3               | 10 <sup>-7</sup>   | 10 <sup>-7</sup>   | 0.85           | 0.39        |
| 4               | 10 <sup>-7</sup>   | 2x10 <sup>-7</sup> | 0.91           | 0.29        |
| 4               | 10 <sup>-7</sup>   | 5x10 <sup>-7</sup> | 0.94           | 0.24        |
| 4               | 10 <sup>-7</sup>   | 10 <sup>-6</sup>   | 0.95           | 0.22        |
| 1               | 2x10 <sup>-7</sup> | 10 <sup>-9</sup>   | 0.92           | 0.28        |
| 3               | 2x10 <sup>-7</sup> | 10 <sup>-7</sup>   | 0.86           | 0.37        |
| 1               | 2x10 <sup>-7</sup> | 2x10 <sup>-7</sup> | 0.90           | 0.32        |
| 3               | 5x10 <sup>-7</sup> | 10 <sup>-7</sup>   | 0.83           | 0.41        |
| 2               | 5x10 <sup>-7</sup> | 5x10 <sup>-7</sup> | 0.97           | 0.17        |
| 3               | 10 <sup>-6</sup>   | 10 <sup>-7</sup>   | 0.81           | 0.43        |
| <b>All Data</b> |                    |                    | <b>0.90</b>    | <b>0.31</b> |

860

861 [Figure 6 - Figure supplement.](#)

862 Statistics of the LP to PD synapse co-modulation. Co-applications with the same Group  
863 number were performed in the same experiments.

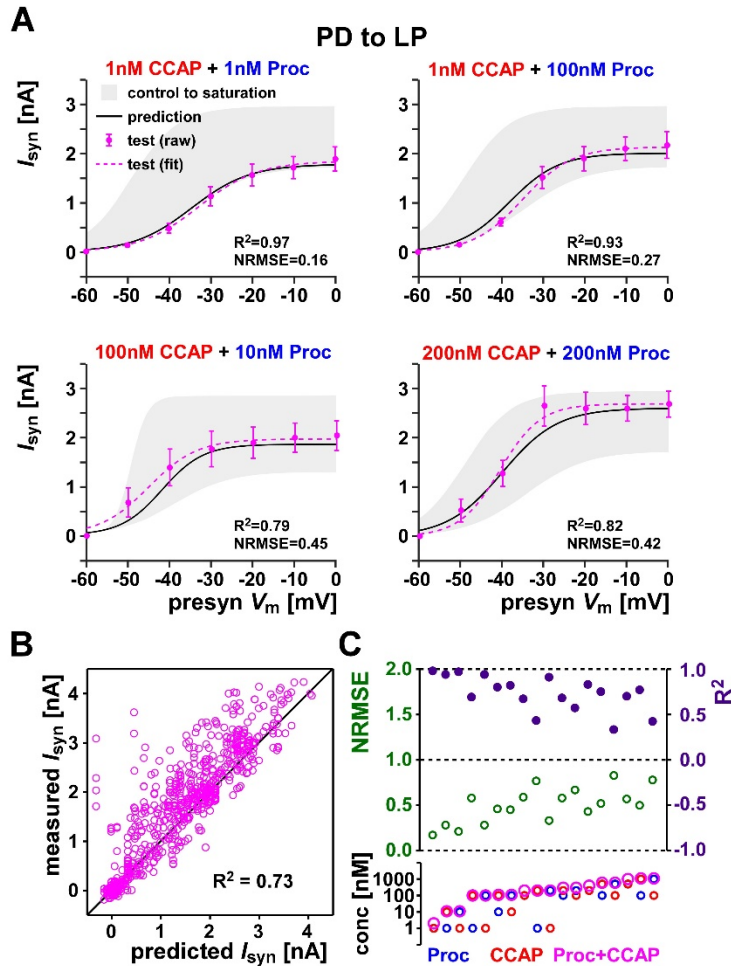

864

865 **Figure 7.**

866 The co-modulatory effect of CCAP and Proc on the PD to LP synapse can be predicted  
 867 from linear summation up to saturation. **(A)** The PD to LP synaptic current activation curve in  
 868 response to co-applied CCAP and Proc at four different concentration combinations (test, raw  
 869 and fit) is well predicted by the model (prediction). Also shown is the range of synaptic currents  
 870 measured in the respective experiments (control to saturation). The  $R^2$  and NRMSE values in  
 871 each case show the goodness of the prediction. **(B)** The prediction values compared with the  
 872 actual measurements for all data points in the 18 different combinations of co-modulation  
 873 measurements of the PD to LP synapse. Also shown, for comparison, are the line of perfect  
 874 prediction ( $y=x$ ) and overall  $R^2$  values. All data points are provided in [Figure 7–source data](#). **(C)**  
 875 The  $R^2$  and NRMSE values shown for each of the 18 co-modulation combinations of the LP to PD  
 876 synapse.  $R^2=1$  and NRMSE=0 indicate perfect predictions, whereas  $R^2=0$  and NRMSE=1 indicate  
 877 that the prediction was no better than the mean of the data. The bottom panel shows the  
 878 concentration of Proc, CCAP and total concentration (Proc+CCAP) in each case. Data are shown  
 879 in order of increasing total concentration. Each combination included 5-6 preparations.

| Group           | [Proc] (M)         | [CCAP] (M)         | R <sup>2</sup> | NRMSE       |
|-----------------|--------------------|--------------------|----------------|-------------|
| 1               | 10 <sup>-9</sup>   | 10 <sup>-9</sup>   | 0.97           | 0.16        |
| 2               | 10 <sup>-9</sup>   | 10 <sup>-8</sup>   | 0.93           | 0.27        |
| 2               | 10 <sup>-9</sup>   | 10 <sup>-7</sup>   | 0.68           | 0.57        |
| 2               | 10 <sup>-9</sup>   | 2x10 <sup>-7</sup> | 0.42           | 0.76        |
| 1               | 10 <sup>-8</sup>   | 10 <sup>-9</sup>   | 0.96           | 0.20        |
| 3               | 10 <sup>-8</sup>   | 10 <sup>-9</sup>   | 0.79           | 0.45        |
| 1               | 10 <sup>-7</sup>   | 10 <sup>-9</sup>   | 0.93           | 0.27        |
| 4               | 10 <sup>-7</sup>   | 10 <sup>-8</sup>   | 0.81           | 0.44        |
| 3               | 10 <sup>-7</sup>   | 10 <sup>-7</sup>   | 0.66           | 0.58        |
| 4               | 10 <sup>-7</sup>   | 2x10 <sup>-7</sup> | 0.67           | 0.57        |
| 4               | 10 <sup>-7</sup>   | 5x10 <sup>-7</sup> | 0.74           | 0.51        |
| 4               | 10 <sup>-7</sup>   | 10 <sup>-6</sup>   | 0.76           | 0.49        |
| 1               | 2x10 <sup>-7</sup> | 10 <sup>-9</sup>   | 0.90           | 0.32        |
| 3               | 2x10 <sup>-7</sup> | 10 <sup>-7</sup>   | 0.56           | 0.66        |
| 1               | 2x10 <sup>-7</sup> | 2x10 <sup>-7</sup> | 0.82           | 0.42        |
| 3               | 5x10 <sup>-7</sup> | 10 <sup>-7</sup>   | 0.32           | 0.82        |
| 2               | 5x10 <sup>-7</sup> | 5x10 <sup>-7</sup> | 0.69           | 0.56        |
| 3               | 10 <sup>-6</sup>   | 10 <sup>-7</sup>   | 0.41           | 0.77        |
| <b>All Data</b> |                    |                    | <b>0.73</b>    | <b>0.52</b> |

880

881 [Figure 7 - Figure supplement.](#)

882 Statistics of the PD to LP synapse co-modulation. Co-applications with the same Group  
883 number were performed in the same experiments.

884 **Figure 8.**

885 The co-modulatory effect  
 886 of CCAP and Proc on the levels of  
 887  $I_{MI}$  in the LP neuron cannot be  
 888 predicted from linear summation  
 889 up to saturation. **(A)** Measurement  
 890 of  $I_{MI}$  in the LP neuron. The total  
 891 membrane current ( $I_m$ ) was  
 892 measured in the LP neuron, with  
 893 500 ms voltage steps from -60 to 0  
 894 mV, in control saline and in the  
 895 presence of 100 nM Proc. The  
 896 difference current ( $\Delta I_m$ ) was  
 897 calculated by digital subtraction  
 898 and  $I_{MI}$  was calculated as the mean  
 899 current in the latter half of the  
 900 voltage step (arrow). **(B)** Example  
 901 of the  $I_{MI}$  IV curves measured in  
 902 two experiments in increasing  
 903 concentrations of CCAP or Proc,  
 904 shown together with the fit of the  
 905 data points using equation (2). **(C)** Dose-dependent levels of  $I_{MI}$  (measured at -15 mV) in the  
 906 presence of Proc, CCAP or both (1  $\mu$ M of each). Dose-dependent parameters, for CCAP:  $I_{max} =$   
 907 3.080,  $C_{mid} = -7.025$ ,  $C_c = 0.7997$ ; for Proc:  $I_{max} = 4.797$ ,  $C_{mid} = -7.568$ ,  $C_c = 0.8699$ .  $I_{MI}$  measured with  
 908 co-applied 1  $\mu$ M CCAP and Proc in the two sets of the experiments were not significantly  
 909 different (Student's t-test,  $p = 0.31$ ,  $N = 6$  for both sets of experiments.) **(D)** The linear-  
 910 summation-up-to-saturation prediction values compared with the actual measurements of  $I_{MI}$   
 911 for all data points in the 18 different combinations of co-modulation. Also shown, for  
 912 comparison, are the line of perfect prediction ( $y=x$ ) and overall  $R^2$  values. **All data points are**  
 913 **provided in Figure 8–source data.** **(E)** Measured (at -15 mV) and predicted  $I_{MI}$  values, as well as  
 914 the  $R^2$  and NRMSE values shown for each of the 18 co-modulation combinations.  $R^2=1$  and  
 915  $NRMSE=0$  indicate perfect predictions, whereas  $R^2=0$  and  $NRMSE=1$  indicate that the prediction  
 916 was no better than the mean of the data. Stars indicate out of range values. The bottom panel  
 917 shows the concentration of Proc, CCAP and total concentration (Proc+CCAP) in each case. Data  
 918 are shown in order of increasing total concentration. Each combination included 4-5  
 919 preparations.

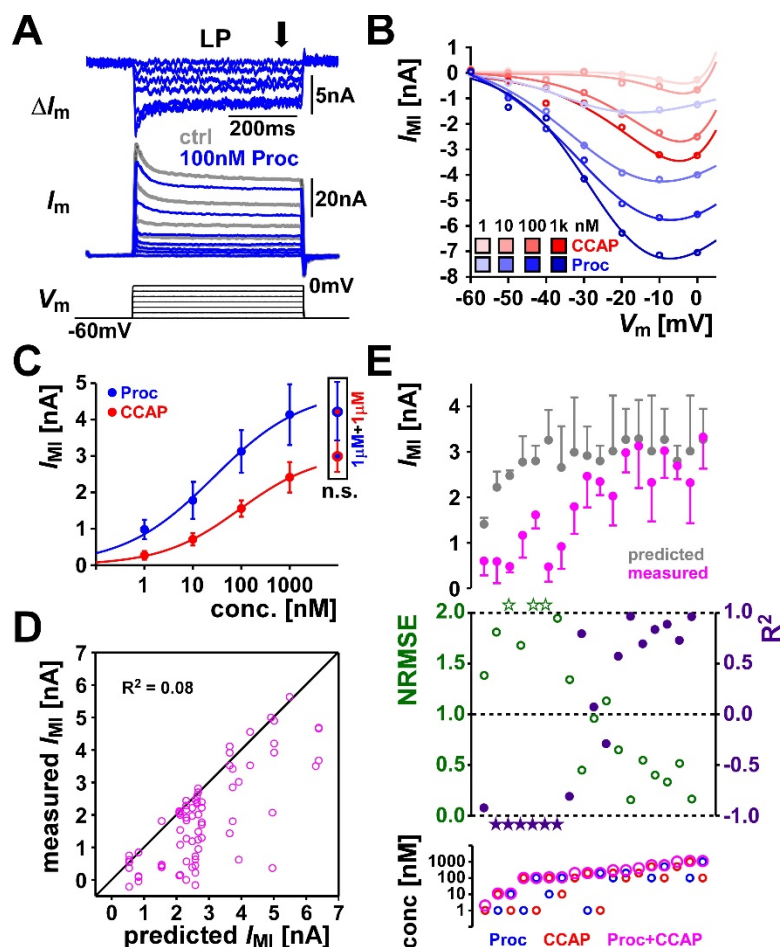



| Group           | [Proc] (M)         | [CCAP] (M)         | R <sup>2</sup> | NRMSE       |
|-----------------|--------------------|--------------------|----------------|-------------|
| 1               | 10 <sup>-9</sup>   | 10 <sup>-9</sup>   | -0.92          | 1.38        |
| 2               | 10 <sup>-9</sup>   | 10 <sup>-8</sup>   | -62.69         | 7.98        |
| 2               | 10 <sup>-9</sup>   | 10 <sup>-7</sup>   | -4.03          | 2.24        |
| 2               | 10 <sup>-9</sup>   | 2x10 <sup>-7</sup> | 0.08           | 0.96        |
| 1               | 10 <sup>-8</sup>   | 10 <sup>-9</sup>   | -2.27          | 1.81        |
| 3               | 10 <sup>-8</sup>   | 10 <sup>-9</sup>   | -2.78          | 1.94        |
| 1               | 10 <sup>-7</sup>   | 10 <sup>-9</sup>   | -1.82          | 1.68        |
| 4               | 10 <sup>-7</sup>   | 10 <sup>-8</sup>   | -20.03         | 4.59        |
| 3               | 10 <sup>-7</sup>   | 10 <sup>-7</sup>   | -0.80          | 1.34        |
| 4               | 10 <sup>-7</sup>   | 2x10 <sup>-7</sup> | 0.57           | 0.65        |
| 4               | 10 <sup>-7</sup>   | 5x10 <sup>-7</sup> | 0.83           | 0.41        |
| 4               | 10 <sup>-7</sup>   | 10 <sup>-6</sup>   | 0.97           | 0.17        |
| 1               | 2x10 <sup>-7</sup> | 10 <sup>-9</sup>   | 0.79           | 0.45        |
| 3               | 2x10 <sup>-7</sup> | 10 <sup>-7</sup>   | -0.29          | 1.13        |
| 1               | 2x10 <sup>-7</sup> | 2x10 <sup>-7</sup> | 0.97           | 0.16        |
| 3               | 5x10 <sup>-7</sup> | 10 <sup>-7</sup>   | 0.69           | 0.55        |
| 2               | 5x10 <sup>-7</sup> | 5x10 <sup>-7</sup> | 0.89           | 0.34        |
| 3               | 10 <sup>-6</sup>   | 10 <sup>-7</sup>   | 0.73           | 0.52        |
| <b>All Data</b> |                    |                    | <b>0.08</b>    | <b>0.96</b> |

920

921 [Figure 8 - Figure supplement.](#)

922 Statistics of the  $I_{MI}$  co-modulation. Co-applications with the same Group number were  
 923 performed in the same experiments.
